# Supplementary material for: Pretreated Green Pea Flour as Wheat Flour Substitutes in Composite Bread Making
Source: MDPI journal article supplement (doi:10.3390/foods12122284), 2023-06-06
Supplement: s1 [file s1]

**Table S1:** Nutritional composition of pea flour by different pre-treatments.

|                   | <b>W</b> | <b>C</b> | <b>P</b> | <b>N</b> |
|-------------------|----------|----------|----------|----------|
| Energy (Kcal)     | 367      | 334      | 339      | 344      |
| Fats (g)          | 3.3      | 1.7      | 2.4      | 2.1      |
| Saturated fat (g) | 0.2      | 0.3      | 0.4      | 0.4      |
| Carbohydrates (g) | 76.7     | 50.6     | 52.9     | 53.0     |
| Sugars (g)        | 1.7      | 2.9      | 2.8      | 2.4      |
| Fibers (g)        | 1.7      | 7.8      | 9.2      | 9.4      |
| Proteins (g)      | 10.0     | 25.2     | 21.9     | 23.9     |
| Salt (g)          | 0.01     | 0.01     | 0.01     | 0.01     |

Note: W= control wheat flour, C= conventional, P= Pre-cooked, N= soaked under pressure-streamed.

**Table S2:** Changes in moisture content, firmness, and cohesiveness during storage

|                         | 0            | 1            | 3            | 7            |
|-------------------------|--------------|--------------|--------------|--------------|
| <b>Moisture content</b> |              |              |              |              |
| <b>W</b>                | 40.96±0.33a  | 41.13±0.13a  | 40.87±0.29a  | 41.94±1.15a  |
| <b>C10</b>              | 42.57±0.06a  | 42.32±0.29ab | 41.9±0.25b   | 40.98±0.29c  |
| <b>C20</b>              | 42.73±0.4ab  | 43.46±0.12a  | 42.55±0.04b  | 40.85±0.35c  |
| <b>C30</b>              | 42.93±0.24a  | 43.51±0.3a   | 42.36±0.39a  | 40.94±0.44b  |
| <b>C50</b>              | 43.19±0.09bc | 44.47±0.07a  | 43.6±0.6ab   | 42.34±0.17c  |
| <b>P10</b>              | 41.5±0.23c   | 43.19±0.36a  | 42.37±0.36bc | 42.89±0.21ab |
| <b>P20</b>              | 42.96±0.13ab | 44.8±0.16a   | 43.69±0.57bc | 44.2±0.22ab  |
| <b>P30</b>              | 44.37±0.82b  | 46.1±0.14a   | 45.51±0.31ab | 45.38±0.18ab |
| <b>P50</b>              | 47.9±0.04b   | 49.28±0.17a  | 48.42±0.4a   | 47.53±0.48b  |
| <b>N10</b>              | 43±1.35a     | 42.15±0.12a  | 42.09±0.14a  | 41.82±0.39a  |
| <b>N20</b>              | 43.47±0.27a  | 42.56±0.01a  | 43.29±0.12a  | 42.78±0.05a  |
| <b>N30</b>              | 43.2±0.11a   | 43.33±0.12a  | 43.71±0.17a  | 43.31±0.31a  |
| <b>N50</b>              | 44.62±0.13a  | 46.02±0.04a  | 44.93±0.19a  | 44.5±3.66a   |
| <b>Firmness</b>         |              |              |              |              |
| <b>W</b>                | 2.81±0.91c   | 2.66±1.41d   | 6.39±1.85b   | 7.35±3.54a   |
| <b>C10</b>              | 3.21±1.33c   | 6.39±1.85b   | 7.45±1.59a   | 10.07±5.29ab |
| <b>C20</b>              | 8.16±1.03d   | 13.87±2.27c  | 16.32±5.23b  | 22.72±3.82a  |
| <b>C30</b>              | 13.62±1.53d  | 19.11±3.52b  | 27.39±5.99b  | 35.64±4.36a  |
| <b>C50</b>              | 24.34±3.52d  | 38.20±4.44a  | 39.54±5.76a  | 33.66±6.42b  |
| <b>P10</b>              | 2.77±0.9c    | 5.07±1.93d   | 17.92±6.96a  | 8.41±3.13ab  |
| <b>P20</b>              | 5.65±1.71d   | 10.96±2.04c  | 19.60±4.25a  | 9.69±4.12b   |
| <b>P30</b>              | 7.14±1.34d   | 17.68±3.15b  | 22.37±3.87a  | 11.50±3.06c  |
| <b>P50</b>              | 15.11±1.89c  | 38.04±3.65a  | 32.91±2.94b  | 12.29±2.82d  |
| <b>N10</b>              | 4.23±1.09c   | 3.74±1.37c   | 7.82±2.75b   | 9.51±2.54a   |
| <b>N20</b>              | 5.32±1.44d   | 8.86±3.07c   | 15.88±2.64b  | 20.23±4.29a  |
| <b>N30</b>              | 9.72±1.18c   | 20.48±3.24b  | 20.65±3.19b  | 30.13±4.93a  |
| <b>N50</b>              | 24.34±2.49d  | 32.01±2.67b  | 32.89±3.87b  | 44.52±6.61a  |
| <b>Cohesiveness</b>     |              |              |              |              |
| <b>W</b>                | 0.66±0.04a   | 0.51±0.05b   | 0.42±0.02c   | 0.42±0.02c   |
| <b>C10</b>              | 0.51±0.05a   | 0.47±0.03b   | 0.36±0.01c   | 0.35±0.04c   |
| <b>C20</b>              | 0.48±0.03a   | 0.41±0.04ab  | 0.31±0.03bc  | 0.27±0.02c   |
| <b>C30</b>              | 0.49±0.02a   | 0.33±0.02b   | 0.28±0.04c   | 0.28±0.04c   |
| <b>C50</b>              | 0.39±0.02a   | 0.29±0.02b   | 0.28±0.02b   | 0.26±0.03b   |
| <b>P10</b>              | 0.61±0.06a   | 0.43±0.03b   | 0.37±0.02c   | 0.31±0.04c   |
| <b>P20</b>              | 0.59±0.03a   | 0.36±0.02b   | 0.31±0.01c   | 0.27±0.03c   |
| <b>P30</b>              | 0.54±0.03a   | 0.35±0.02b   | 0.32±0.02b   | 0.27±0.02c   |
| <b>P50</b>              | 0.44±0.02a   | 0.31±0.02b   | 0.33±0.04b   | 0.27±0.03b   |
| <b>N10</b>              | 0.66±0.02a   | 0.46±0.02 b  | 0.27±0.03c   | 0.35±0.02c   |
| <b>N20</b>              | 0.61±0.02a   | 0.40±0.04b   | 0.35±0.03b   | 0.29±0.02    |
| <b>N30</b>              | 0.54±0.03a   | 0.35±0.03b   | 0.32±0.049b  | 0.28±0.02b   |
| <b>N50</b>              | 0.44±0.01a   | 0.36±0.03b   | 0.34±0.03b   | 0.27±0.03c   |
